# Supplementary material for: Distributions of bacteriohopanepolyols in lakes and coastal lagoons of the Azores Archipelago
Source: Copernicus journal article supplement (doi:10.5194/bg-20-2065-2023), 2023-06-12
Supplement: Supplementary file 1 [file bg-20-2065-2023-supplement.zip]

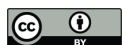

## *Supplement of*

# **Distributions of bacteriohopanepolyols in lakes and coastal lagoons of the Azores Archipelago**

**Nora Richter et al.**

*Correspondence to:* Nora Richter (nora.richter@nioz.nl)

- bg-20-2065-2023-supplement-title-page.pdf
- Supplements
  - TableS1\_Azores\_BHPs\_SurfaceSediments.xlsx
  - TableS2\_Azores\_BHPs\_WaterColumn.xlsx
  - TableS3\_Methylobacter-Methylotenera.xlsx
  - TableS4\_BHP\_InclusionList.xlsx
  - TableS5-S7\_LakeProperties.xlsx
  - TableS4\_BHP\_InclusionList.xlsx

The copyright of individual parts of the supplement might differ from the article licence.
