# Supplementary material for: Distributions of bacteriohopanepolyols in lakes and coastal lagoons of the Azores Archipelago
Source: Copernicus journal article supplement (doi:10.5194/bg-20-2065-2023), 2023-06-12
Supplement: Supplementary file 1 [file TableS1_Azores_BHPs_SurfaceSediments.xlsx]

## Sheet: SurfaceSediment
Table S1. Bulk elemental composition and bacteriohopanepolyol raw data for all surface sediment samples analyzed from the Azores Archipelago where BHPs reported in response units/g of dry sediment.
Sample ID	Type	Lake	Depth (m)	TN (%)	TOC (%)	δ15N (‰, Air)	δ13C (‰, VPDB)	adenosylhopane	adenosylhopaneHG-Me	2Me-adenosylhopane	Me-adenosylhopane, unknown isomer	adenosylhopaneHG-Me	3Me-adenosylhopane	adenosylhopaneHG-diMe	Me-adenosylhopaneHG-Me	2Me-adenosylhopaneHG-Me	Me-adenosylhopaneHG-Me	adenosylhopaneHG-diMe	Me-adenosylhopaneHG-diMe	diMe-adenosylhopaneHG-Me	2Me-adenosylhopaneHG-diMe	Me-adenosylhopaneHG-diMe	2,3diMe-adenosylhopaneHG-diMe	inosylhopane	Me-inosylhopane	Me-inosylhopane	N1-methylinosylhopane	2Me-N1-methylinosylhopane	Me-N1-methyl-inosylhopane	Me-N1-methyl-inosylhopane	BHT	Δ6-BHT (34S)	Δ6-BHT (34R)	2Me-BHT	3Me-BHT	Δ6-3MeBHT	Δ11-3MeBHT	Methoxylated-BHT I	Methoxylated-BHT II	BHT-CE	BHT-Me-CE	MeBHT-CE	Anhydro-BHT	BHpentol	Bhpentol-CE	BHhexol	BHhexol-CE	aminotriol I	aminotriol II
m/z								662.5	676.516	676.516	676.516	676.516	676.516	690.532	690.532	690.532	690.532	690.532	704.547	704.547	704.547	704.547	718.563	663.484	677.5	677.5	677.5	691.516	691.516	691.516	564.499	562.483	562.483	578.514	578.514	576.499	576.499	578.514	578.514	708.541	722.557	722.557	546.488	580.494	724.536	579.462	740.531	546.488	546.488
tr (min)								21.71	17.42	21.82	22.3	22.9	23.76	17.6	17.9	22.96	23.62	25.15	18.06	23.68	25.17	26.09	26.14	20.33	20.45	20.9	23.91	24.03	24.54	24.99	20.48	18.28	18.43	20.62	22.26	20.15	22.07	21.71	22.3	17.15	17.25	18.63	24.09	18.59	15.91	16.59	14.39	16.84	17.52
Azul_SS6	Sediment	Azul	5	0.597804	4.4348	1.97856	-23.6879	4.57452e+10	0	5.39742e+09	6.63766e+08	4.06709e+09	0	0	0	3.35139e+09	0	4.20832e+09	0	0	3.00619e+09	6.44169e+08	0	9.65841e+09	1.5307e+09	0	1.71315e+10	6.9358e+09	0	0	1.33086e+11	0	0	0	2.53059e+10	0	0	0	0	1.48787e+11	5.11123e+09	0	2.95483e+10	1.15692e+10	2.15997e+09	9.82778e+09	1.4698e+09	0	2.5574e+11
Azul_SS4	Sediment	Azul	23	0.620394	5.4863	1.98765	-25.9697	6.74936e+10	4.33071e+09	9.53668e+09	5.9907e+08	7.41059e+09	0	0	0	6.25652e+09	0	8.84639e+09	0	0	5.22865e+09	2.44049e+09	0	9.2668e+09	1.06038e+09	9.97177e+08	2.60911e+10	6.19847e+09	5.37303e+08	0	1.5424e+11	0	0	0	1.846e+10	1.26446e+10	0	0	0	1.10094e+11	5.29852e+09	0	3.44504e+10	3.49704e+10	2.41505e+09	3.68968e+09	8.72985e+08	2.24017e+10	1.96329e+11
Azul_SS5	Sediment	Azul	23	0.620394	5.4863	2.09342	-25.7773	1.61166e+11	7.80059e+09	2.73442e+10	3.60541e+09	2.20203e+10	4.852e+08	0	0	2.12711e+10	0	3.14061e+10	0	0	2.17975e+10	7.18653e+09	0	2.55235e+10	4.01678e+09	2.86642e+09	7.9388e+10	1.87266e+10	1.33233e+09	0	3.18634e+11	0	0	0	3.78507e+10	3.27674e+10	0	0	0	2.23976e+11	1.3018e+10	0	9.13614e+10	5.10397e+10	6.25846e+09	9.93403e+09	0	5.00787e+10	3.05348e+11
Cubres_SS3	Sediment	Cubres East	2	1.949	13.7916	1.33447	-18.8879	4.46523e+10	0	5.069e+09	0	3.51936e+10	0	0	0	1.78165e+10	0	5.25312e+10	0	0	5.67817e+10	8.41875e+09	0	4.62902e+09	0	0	2.52394e+10	5.09375e+09	0	0	6.48305e+11	0	0	4.77515e+10	0	0	0	1.48795e+11	1.1819e+11	0	0	0	5.83591e+10	1.78568e+10	0	9.00021e+09	0	4.85431e+10	2.62418e+11
Cubres_SS6	Sediment	Cubres West	2	1.92422	13.8869	2.12914	-15.3058	3.88345e+10	7.19738e+09	2.34058e+09	0	1.07752e+10	0	0	0	4.64584e+09	0	1.31817e+10	0	0	1.19427e+10	2.16289e+09	0	5.24038e+09	0	0	1.54344e+10	2.85651e+09	0	0	2.53086e+11	0	0	1.56301e+10	0	1.29399e+10	0	4.39222e+10	6.88179e+10	4.27261e+10	2.20039e+09	0	1.4129e+10	0	3.27224e+09	1.78565e+09	4.6035e+08	7.50206e+09	2.03944e+11
Empadadas_SS7	Sediment	Empadadas	2	0.893665	8.94503	-0.171608	-27.0929	7.12323e+11	4.22665e+10	1.49297e+11	2.3181e+10	1.172e+11	0	0	0	6.87892e+10	2.00145e+10	1.69711e+11	0	2.60002e+09	1.00268e+11	6.41344e+10	1.08278e+10	1.91045e+11	1.64193e+10	2.16607e+10	9.02787e+11	1.98455e+11	6.4718e+10	1.53533e+10	6.95099e+11	0	0	1.01735e+11	2.07933e+10	0	5.87705e+10	0	0	3.76373e+11	9.62857e+10	0	6.56938e+10	7.75563e+10	3.11336e+10	5.74556e+10	0	0	6.80224e+11
Empadadas_SS8	Sediment	Empadadas	2	0.929176	9.31599	-0.0943083	-27.3663	2.79996e+11	3.50006e+10	5.29342e+10	9.11427e+09	4.48511e+10	0	2.44773e+10	0	2.46415e+10	7.0383e+09	5.13927e+10	0	1.46147e+09	2.90523e+10	1.96499e+10	3.06295e+09	8.01184e+10	5.97342e+09	8.97696e+09	3.58541e+11	7.18967e+10	2.42025e+10	4.34694e+09	2.51365e+11	1.035e+10	0	2.834e+10	9.50157e+09	0	2.07413e+10	0	0	2.8469e+11	7.56794e+10	0	2.84052e+10	3.0469e+10	2.64617e+10	2.54606e+10	1.83058e+10	0	4.07892e+11
Empadadas_SS9	Sediment	Empadadas	2	0.698804	7.08859	-0.235289	-27.4494	8.12903e+10	7.72961e+09	1.27109e+10	3.35845e+09	7.8136e+09	0	5.50229e+09	0	4.42536e+09	1.47425e+09	9.41712e+09	0	1.51484e+08	5.20875e+09	3.97419e+09	6.16518e+08	1.96421e+10	1.38392e+09	1.89867e+09	9.26374e+10	1.85875e+10	4.88054e+09	1.10312e+09	7.17054e+10	3.7722e+09	0	1.14974e+10	2.79628e+09	0	5.66788e+09	0	0	6.24568e+10	1.80573e+10	0	4.96246e+09	7.09319e+09	5.34218e+09	4.46429e+09	4.87276e+09	0	1.22537e+11
Empadadas_SS10	Sediment	Empadadas	2	0.767685	7.69725	-0.216052	-27.5646	4.08168e+11	4.04711e+10	7.92826e+10	1.70332e+10	5.42331e+10	0	3.50698e+10	0	3.03103e+10	1.01834e+10	7.22769e+10	0	2.1846e+09	4.17622e+10	3.05756e+10	5.6939e+09	1.03579e+11	7.33651e+09	1.28794e+10	5.30185e+11	1.07783e+11	3.44653e+10	5.40573e+09	3.33218e+11	9.1594e+09	0	4.98965e+10	1.84416e+10	0	3.26001e+10	0	0	3.35774e+11	8.55931e+10	0	3.00011e+10	4.37047e+10	3.19041e+10	2.99515e+10	3.16687e+10	0	4.18479e+11
Funda_SS1	Sediment	Funda	29.7	0.890434	7.18373	1.51378	-30.7411	1.26751e+11	1.92478e+10	1.6204e+10	7.65327e+09	2.67162e+10	0	0	0	1.44621e+10	1.51839e+09	4.61269e+10	0	0	3.24623e+10	1.99441e+10	1.16801e+09	1.00095e+10	0	1.23482e+09	6.41232e+10	1.72145e+10	2.56943e+09	0	7.8058e+11	0	0	2.03047e+10	1.73501e+10	7.26924e+10	0	0	0	1.10364e+12	3.11721e+10	0	2.69884e+10	1.67454e+10	0	0	3.42838e+09	8.58201e+10	8.78108e+11
Lomba_SS1	Sediment	Lomba	14.3	2.09421	20.9932	0.93683	-27.9492	3.31238e+11	5.4869e+10	3.28798e+10	7.34945e+09	5.27608e+10	5.02445e+08	1.60333e+10	0	2.69255e+10	3.38566e+09	6.1546e+10	0	0	2.28788e+10	1.39358e+10	2.21998e+09	8.01705e+10	8.08845e+09	4.8853e+09	2.23566e+11	3.76933e+10	8.18539e+09	0	3.40642e+11	0	0	2.99553e+10	1.46023e+10	0	1.08817e+10	0	0	3.13682e+11	5.00886e+10	0	3.20792e+10	6.65023e+10	2.69308e+10	1.60375e+10	1.28795e+10	0	4.32246e+11
Lomba_SS2	Sediment	Lomba	14.3	1.78913	17.9034	0.977519	-27.3956	2.87183e+11	5.08317e+10	3.24731e+10	7.2228e+09	6.61994e+10	1.58695e+09	1.75663e+10	0	3.78521e+10	1.98893e+09	6.84321e+10	0	0	3.06028e+10	1.60461e+10	2.36853e+09	7.45074e+10	8.72856e+09	5.35166e+09	1.83079e+11	3.67802e+10	8.46675e+09	1.16109e+09	1.9215e+11	0	0	2.1056e+10	1.24233e+10	0	6.87835e+09	0	0	1.99735e+11	5.56038e+10	0	3.88425e+10	2.35526e+10	8.21555e+09	1.08815e+10	5.13592e+09	0	2.28511e+11
Negra_SS1	Sediment	Negra	114	0.995223	8.047	1.62718	-30.5753	2.68889e+11	2.75565e+11	9.89472e+09	2.19857e+09	1.52464e+11	0	0	0	1.24332e+10	0	1.8587e+10	0	0	1.70135e+10	4.38407e+09	0	4.00942e+09	2.18985e+09	2.22759e+09	2.84481e+10	8.21405e+09	0	0	5.54983e+11	0	0	0	2.93223e+10	2.04988e+11	0	0	0	9.56712e+11	1.26918e+10	0	3.26034e+10	2.73994e+10	0	6.16061e+09	0	0	5.01879e+11
Negra_SS2	Sediment	Negra	114	0.655302	5.50278	3.12312	-30.5045	6.98886e+10	5.13267e+10	7.84572e+09	2.87437e+09	3.12162e+10	0	3.51263e+09	3.29415e+09	9.41164e+09	9.87089e+08	1.03429e+10	3.4506e+09	0	1.02266e+10	3.72759e+09	0	6.46413e+09	1.24356e+09	2.15301e+09	1.86687e+10	5.98745e+09	0	0	1.46918e+11	0	0	5.69321e+09	2.10852e+10	2.10852e+10	0	0	0	2.37191e+11	1.10641e+10	0	1.26731e+10	8.94072e+09	0	0	0	0	1.76774e+11
SaoJorge_SS1	Sediment	Sao Jorge	2.5	0.856882	9.62122	0.60254	-27.5487	8.88136e+10	1.14743e+10	1.20842e+10	3.98233e+09	1.53512e+10	0	3.98318e+09	1.22384e+09	7.95003e+09	5.90286e+08	1.46194e+10	2.47397e+09	0	7.1402e+09	3.31516e+09	4.48869e+08	2.5387e+10	3.82341e+09	1.63936e+09	1.02255e+11	1.98557e+10	3.73807e+09	0	4.56217e+10	2.58411e+09	0	1.48256e+10	3.50402e+09	1.00003e+09	1.03646e+10	0	0	5.76525e+10	4.73844e+09	0	8.21259e+09	2.4885e+09	2.82292e+09	3.66159e+09	2.78357e+09	0	3.48804e+10
SaoJorge_SS2	Sediment	Sao Jorge	2.5	1.07595	12.3867	1.67483	-25.4765	1.48092e+11	1.27687e+10	2.02276e+10	1.1184e+10	4.67735e+10	0	5.95807e+09	3.60764e+09	2.65849e+10	1.74614e+09	3.39018e+10	1.55464e+10	0	1.94413e+10	7.45637e+09	6.29635e+08	3.83386e+10	5.88187e+09	3.48221e+09	1.62242e+11	3.76644e+10	5.49623e+09	8.99743e+08	1.06764e+11	6.23113e+09	0	1.69694e+10	1.15127e+10	0	1.15795e+10	0	0	7.94679e+10	0	6.18857e+09	3.12427e+10	9.10645e+09	5.50031e+09	1.45734e+10	5.899e+09	0	9.5759e+10
Verde_SS3	Sediment	Verde	5	1.22049	8.80649	-1.31663	-27.6043	3.40897e+10	0	2.69598e+09	7.1634e+08	4.24509e+09	0	0	0	2.92574e+09	0	5.64205e+09	0	0	2.377e+09	7.79164e+08	0	1.13447e+10	0	0	3.97324e+10	3.92773e+10	0	0	1.63209e+11	0	0	0	2.43123e+10	1.74598e+10	0	0	0	3.80069e+11	8.61455e+09	0	2.5826e+10	0	7.77389e+10	0	2.68246e+09	4.85407e+10	2.7428e+11
Verde_SS1	Sediment	Verde	22.5	0.863548	8.17839	1.06978	-25.9875	2.40198e+10	1.92651e+09	2.10934e+09	0	5.14393e+09	0	4.43491e+08	0	3.88574e+09	0	6.29642e+09	0	0	4.01834e+09	1.4235e+09	0	2.44275e+09	0	0	1.72128e+10	8.72119e+09	0	0	2.08254e+11	0	0	6.43538e+09	1.11399e+10	1.37606e+10	0	0	0	1.87726e+11	7.11345e+09	4.93536e+09	5.0838e+10	1.71616e+10	3.05823e+10	5.67738e+09	1.55331e+09	7.36646e+10	2.72505e+11
[truncated: 40 more columns]
