# Supplementary material for: Distributions of bacteriohopanepolyols in lakes and coastal lagoons of the Azores Archipelago
Source: Copernicus journal article supplement (doi:10.5194/bg-20-2065-2023), 2023-06-12
Supplement: Supplementary file 2 [file TableS2_Azores_BHPs_WaterColumn.xlsx]

## Sheet: WaterColumn
Table S2. Bacteriohopanepolyol raw data for all water column samples analyzed from the Azores Archipelago where BHPs reported in response units/L of water filtered.
Sample ID	Type	Lake	Depth (m)	adenosylhopane	adenosylhopaneHG-Me	2Me-adenosylhopane	Me-adenosylhopane, unknown isomer	adenosylhopaneHG-Me	3Me-adenosylhopane	adenosylhopaneHG-diMe	Me-adenosylhopaneHG-Me	2Me-adenosylhopaneHG-Me	Me-adenosylhopaneHG-Me	adenosylhopaneHG-diMe	Me-adenosylhopaneHG-diMe	diMe-adenosylhopaneHG-Me	2Me-adenosylhopaneHG-diMe	Me-adenosylhopaneHG-diMe	2,3diMe-adenosylhopaneHG-diMe	inosylhopane	Me-inosylhopane	Me-inosylhopane	N1-methylinosylhopane	2Me-N1-methylinosylhopane	Me-N1-methyl-inosylhopane	Me-N1-methyl-inosylhopane	BHT	Δ6-BHT (34S)	Δ6-BHT (34R)	2Me-BHT	3Me-BHT	Δ6-3MeBHT	Δ11-3MeBHT	Methoxylated-BHT I	Methoxylated-BHT II	BHT-CE	BHT-Me-CE	MeBHT-CE	Anhydro-BHT	BHpentol	Bhpentol-CE	BHhexol	BHhexol-CE	aminotriol I	aminotriol II	aminotriol III	Δ6-aminotriol	unsaturated aminotriol	2Me-aminotriol
m/z				662.5	676.516	676.516	676.516	676.516	676.516	690.532	690.532	690.532	690.532	690.532	704.547	704.547	704.547	704.547	718.563	663.484	677.5	677.5	677.5	691.516	691.516	691.516	564.499	562.483	562.483	578.514	578.514	576.499	576.499	578.514	578.514	708.541	722.557	722.557	546.488	580.494	724.536	579.462	740.531	546.488	546.488	546.488	544.472	544.472	560.504
tr (min)				21.71	17.42	21.82	22.3	22.9	23.76	17.6	17.9	22.96	23.62	25.15	18.06	23.68	25.17	26.09	26.14	20.33	20.45	20.9	23.91	24.03	24.54	24.99	20.48	18.28	18.43	20.62	22.26	20.15	22.07	21.71	22.3	17.15	17.25	18.63	24.09	18.59	15.91	16.59	14.39	16.84	17.52	18.15	15.83	16.72	17.74
AZ_MY_001_2018	Water_Column	Azul	1	3.89837e+08	0	0	0	0	0	0	0	0	0	0	0	0	0	0	0	0	0	0	0	0	0	0	8.95029e+09	0	0	0	0	0	0	0	0	3.40565e+10	0	0	0	0	0	0	0	7.10063e+09	4.90793e+09	0	0	0	0
AZ_MY_005_2018	Water_Column	Azul	5	5.24691e+08	0	0	0	0	0	0	0	0	0	0	0	0	0	0	0	0	0	0	0	0	0	0	1.26295e+10	0	0	0	0	0	0	0	0	3.00601e+10	0	0	0	0	0	0	0	6.2379e+09	4.90624e+09	0	0	0	0
AZ_MY_015_2018	Water_Column	Azul	15	2.39121e+07	0	0	0	6.62023e+06	0	0	0	0	0	2.55691e+06	0	0	0	0	0	0	0	0	1.80327e+07	0	0	0	1.17507e+09	0	0	0	0	0	0	0	0	1.4513e+09	3.10628e+08	0	0	0	0	0	0	7.59084e+08	1.21477e+09	0	2.28057e+07	0	0
CUE_000_2018	Water_Column	Cubres East	0	4.07007e+07	0	0	0	1.34088e+07	0	0	0	0	0	1.28859e+07	0	0	2.88649e+07	0	0	0	0	0	0	0	0	0	1.36906e+09	0	0	0	0	0	0	0	0	0	0	0	0	0	0	0	0	2.18082e+08	5.28937e+08	0	0	0	0
CUW_001_2018	Water_Column	Cubres West	0.5	0	0	0	0	0	0	0	0	0	0	0	0	0	0	0	0	0	0	0	0	0	0	0	1.46862e+09	0	0	0	0	0	0	0	0	0	0	0	0	0	0	0	0	0	1.06893e+09	0	0	0	0
EMM1_001_2018	Water_Column	Empadadas	1	5.13768e+09	0	2.7385e+08	3.91352e+08	3.55813e+08	9.31282e+07	0	0	0	0	7.57114e+08	0	0	5.81896e+08	4.23234e+08	0	0	0	0	2.70293e+09	4.96188e+08	3.17191e+08	5.92402e+07	1.05682e+10	1.49137e+09	3.57145e+09	1.85554e+09	0	0	0	0	0	2.13188e+09	1.86044e+09	0	0	0	0	0	0	0	7.94405e+09	0	0	0	0
FNFO_001_2018	Water_Column	Funda	1	1.31829e+09	0	0	0	0	0	0	0	0	0	2.61308e+08	0	0	9.11259e+07	0	0	0	0	0	0	0	0	0	1.00622e+11	0	0	0	0	0	0	0	0	1.87059e+11	0	0	0	0	0	0	0	4.61325e+10	5.9525e+09	0	0	0	0
FNFO_006_2018	Water_Column	Funda	6	2.08557e+09	0	0	0	0	0	0	0	0	0	6.98631e+08	0	0	4.33558e+08	1.99968e+08	0	0	0	0	5.92614e+08	7.23387e+07	1.80642e+07	0	2.73951e+10	0	0	3.84245e+09	0	0	0	0	0	6.80115e+10	0	0	0	0	0	0	0	5.12848e+09	6.03099e+09	0	0	0	0
FNFO_029_2018	Water_Column	Funda	29	2.02336e+08	0	0	0	0	0	0	0	0	0	0	0	0	0	0	0	0	0	0	0	0	0	0	2.7469e+09	0	0	0	0	0	0	0	0	2.92662e+09	0	0	0	0	0	0	0	0	1.8817e+10	0	3.1024e+09	0	0
NGFO_001_2018	Water_Column	Negra	1	8.92721e+08	0	0	0	0	0	0	0	0	0	0	0	0	0	0	0	0	0	0	0	0	0	0	9.88728e+09	0	0	0	0	0	0	0	0	1.12094e+11	0	0	0	0	0	0	0	0	5.45197e+08	0	0	0	0
NGFO_007_2018	Water_Column	Negra	7	4.77371e+08	0	0	0	0	0	0	0	0	0	0	0	0	0	0	0	0	0	0	0	0	0	0	4.61394e+09	0	0	0	0	0	0	0	0	2.9184e+10	0	0	0	0	0	0	0	0	1.77142e+08	0	0	0	0
NGFO_100_2018	Water_Column	Negra	100	9.76479e+07	1.44026e+08	0	0	0	0	0	0	0	0	0	0	0	0	0	0	0	0	0	0	0	0	0	1.13992e+09	0	0	0	0	0	0	0	0	1.93757e+09	0	0	0	0	0	0	0	0	1.02259e+09	0	2.26824e+08	0	0
[truncated: 36 more columns]
