# Supplementary material for: Distributions of bacteriohopanepolyols in lakes and coastal lagoons of the Azores Archipelago
Source: Copernicus journal article supplement (doi:10.5194/bg-20-2065-2023), 2023-06-12
Supplement: Supplementary file 3 [file TableS3_Methylobacter-Methylotenera.xlsx]

## Sheet: Methylobacter-Methylotenera
Table S3. Bacteriohopanepolyol raw data for Methylobacter-Methylotenera co-culture where BHPs are reported in response units.
Sample ID	adenosylhopane	2Me-adenosylhopaneHG-diMe	aminotriol II	Δ6-aminotriol	Δ11- aminotriol	C14:0-N-acyl-aminotriol	C16:0-N-acyl-aminotriol	C16:1-N-acyl-aminotriol	aminotetrol	aminopentol	unsaturated aminopentol	C14:0-N-acyl-aminopentol	C15:0-N-acyl-aminopentol	methylcarbamate-aminotriol II	methylcarbamate-aminotetrol	methylcarbamate-aminopentol	ethenolamine-BHT	ethenolamine-BHhexol	formylated-aminotriol	formylated-aminopentol	aminohexol I	aminohexol II
m/z	662.5	704.547	546.49	544.47	544.47	756.69	784.72	782.7	562.48	578.48	576.46	788.68	816.71	604.49	620.49	636.48	588.5	620.49	574.48	606.47	594.47	594.47
tr (min)	21.77	25.25	17.52	15.47	15.88	33.91	37.41	34.44	16.3	14.69	13.51	27.49	30.82	20.89	18.96	16.87	20.67	16.7	20.28	16.44	13.08	13.94
MOB_1	1.23409e+09	7.49191e+06	2.95865e+11	7.13617e+08	2.30802e+10	5.85298e+07	7.76348e+07	8.69847e+08	4.37857e+10	2.9646e+11	1.83702e+10	6.28761e+07	3.86058e+07	1.07335e+09	0	1.36149e+08	3.65752e+08	5.04284e+07	2.44888e+08	6.15866e+07	1.03676e+09	9.27747e+08
MOB_2	7.36171e+08	1.06124e+07	1.86168e+11	2.00078e+08	1.48753e+10	2.54642e+07	2.6268e+07	2.8276e+08	2.72023e+10	1.96791e+11	1.10668e+10	3.44451e+07	2.20735e+07	5.3819e+08	2.43434e+07	1.14903e+08	1.61788e+08	8.20286e+07	1.88951e+08	1.41601e+08	5.28498e+08	4.57947e+08
MOB_3	1.53816e+09	2.28977e+07	3.93807e+11	4.51712e+08	3.20089e+10	0	0	0	5.82218e+10	3.75142e+11	2.18044e+10	7.44306e+07	3.36477e+07	8.67318e+08	2.72273e+07	2.40755e+08	2.45635e+08	0	1.66688e+08	1.28214e+08	1.07835e+09	9.97085e+08
