# Supplementary material for: Distributions of bacteriohopanepolyols in lakes and coastal lagoons of the Azores Archipelago
Source: Copernicus journal article supplement (doi:10.5194/bg-20-2065-2023), 2023-06-12
Supplement: Supplementary file 4 [file TableS4_BHP_InclusionList.xlsx]

## Sheet: InclusionList
Mass [m/z]	Formula [M]	Compound
429.409	C30 H53 O	BHP Diploterol H+
446.436	C30 H56 O N	BHP Diploterol NH4+
524.446	C35 H58 O2 N	BHP Anhydroaminobacteriohopanetriol unsatx2 H+
525.43	C35 H57 O3	BHP Anhydro-BHT unsatx2 H+
526.462	C35 H60 O2 N	BHP Anhydroaminobacteriohopanetriol unsat H+
527.446	C35 H59 O3	BHP Anhydro-BHT unsat H+
528.478	C35 H62 O2 N	BHP Anhydroaminotriol H+
529.462	C35 H61 O3	BHP AnhydroBHT H+
538.462	C36 H60 O2 N	BHP Me Anhydroaminobacteriohopanetriol unsatx2 H+
539.409	C35 H55 O4	BHP Ribonylhopane unsatx2 H+
539.446	C36 H59 O3	BHP Me Anhydro-BHT unsatx2 H+
540.441	C35 H58 O3 N	BHP 32-oxo-35-aminodiol H+
540.478	C36 H62 O2 N	BHP Me Anhydroaminobacteriohopanetriol unsat H+
541.425	C35 H57 O4	BHP Anhydro-BHPentol unsatx2 H+ and BHP Ribonylhopane unsat H+
541.462	C36 H61 O3	BHP Me Anhydro-BHT unsat H+
542.457	C35 H60 O3 N	BHP Anhydro-BHT unsatx2 NH4+ and BHP 32-oxo-35-aminodiol unsat H+ and BHP aminotriol unsatx2 H+
542.493	C36 H64 O2 N	BHP Me Anhydroaminotriol H+
543.441	C35 H59 O4	BHP Anhydro-BHPentol unsat H+ and BHP BHT 2Unsat H+ and BHP Ribonylhopane H+
543.477	C36 H63 O3	BHP Me AnhydroBHT H+
544.472	C35 H62 O3 N	BHP Anhydro-BHT unsat NH4+ and BHP 32-oxo-35-aminodiol H+and BHP aminotriol unsat H+
545.456	C35 H61 O4	BHP Anhydro BHPentol H+ and BHP BHT unsat H+
546.488	C35 H64 O3 N	BHP aminotriol H+ and BHP AnhydroBHT NH4+
547.472	C35 H63 O4	BHP BHT H+
553.425	C36 H57 O4	BHP Me Ribonylhopane unsatx2 H+
553.462	C37 H61 O3	BHP 2xMe Anhydro-BHT unsatx2 H+
554.457	C36 H60 O3 N	BHP Me 32-oxo-35-aminodiol unsatx2 H+
555.441	C36 H59 O4	BHP Me Anhydro-BHPentol unsatx2 H+ and BHP Me Ribonylhopane unsat H+
555.477	C37 H63 O3	BHP 2xMe Anhydro-BHT unsat H+
556.436	C35 H58 O4 N	BHP Ribonylhopane unsatx2 NH4+ and BHP 31-oxo-35-aminotriol unsat x2 H+
556.472	C36 H62 O3 N	BHP Me Anhydro-BHT unsatx2 NH4+ and BHP Me 32-oxo-35-aminodiol unsat H+ and BHP Me aminotriol unsatx2 H+
557.42	C35 H57 O5	BHP 31-oxo-BHT unsat x2 H+
557.456	C36 H61 O4	BHP Me Anhydro-BHPentol unsat H+ and BHP Me BHT 2Unsat H+ and BHP Me Ribonylhopane H+
557.493	C37 H65 O3	BHP Mex2 AnhydroBHT H+
558.452	C35 H60 O4 N	BHP Anhydro-BHPentol unsat H+ and BHP Ribonylhopane unsat NH4+ and BHP 31-oxo-35-aminotriol unsat H+ and BHP aminotetrol unsatx2 H+
558.488	C36 H64 O3 N	BHP Me Anhydro-BHT unsat NH4+ and BHP Me 32-oxo-35-aminodiol H+ and BHP Me Aminotriol Unsat H+
559.436	C35 H59 O5	BHP 31-oxo-BHT unsat H+ and BHP pentol unsatx2 H+
559.472	C36 H63 O4	BHP Me BHT Unsat H+ and BHP Me Anhydro-Pentol H+
560.467	C35 H62 O4 N	BHP Anhydro-BHPentol unsat NH4+ and BHP BHT 2Unsat NH4+ and BHP Ribonylhopane NH4+ and BHP 31-oxo-35-aminotriol H+ and BHP Aminotetrol Unsat H+
560.504	C36 H66 O3 N	BHP Me Aminotriol H+ and BHP Me AnhydroBHT NH4+
561.451	C35 H61 O5	BHP 31-oxo-BHT H+ and BHP Pentol Unsat H+
561.488	C36 H65 O4	BHP Me BHT H+
562.483	C35 H64 O4 N	BHP aminotetrol H+ and BHP BHT unsat NH4+ and BHP Anhydro BHPentol NH4+
563.467	C35 H63 O5	BHP pentol H+
564.499	C35 H66 O4 N	BHP BHT NH4+
568.436	C36 H58 O4 N	diunsat. oxazinone-aminotriol
570.452	C36 H60 O4 N	diunsat. formylated aminotriol and unsat. oxazinone-aminotriol and BHP Me Ribonylhopane unsatx2 NH4+ and BHP Me 31-oxo-35-aminotriol H+
570.488	C37 H64 O3 N	BHP 2xMe Anhydro-BHT unsat NH4+
571.436	C36 H59 O5	BHP Me 31-oxo-BHT unsat x2 H+
571.483	C36 H63 N2 O3	diunsat. diaminotriol
572.467	C36 H62 O4 N	BHP Me Anhydro-BHPentol unsat NH4+ and BHP Me Ribonylhopane unsat NH4+ and BHP Me 31-oxo-35-aminotriol unsat H+ and BHP Me BHP aminotetrol unsatx2 H+ and unsat. formylated aminotriol and oxazinone-aminotriol
572.504	C37 H66 O3 N	BHP 2xMe Anhydro-BHT NH4+
573.451	C36 H61 O5	BHP Me pentol unsatx2 H+ and BHP Me 31-oxo-BHT unsat H+
573.499	C36 H65 N2 O3	unsat. diaminotriol
574.447	C35 H60 O5 N	BHP 31-oxo-BHT NH4+ and BHP aminopentol unsatx2 H+
574.483	C36 H64 O4 N	BHP Me Anhydro-BHPentol unsat NH4+ and BHP Me BHT 2Unsat NH4+ and BHP Me Ribonylhopane NH4+ and BHP Me 31-oxo-35-aminotriol NH4+ and BHP Me aminotetrol unsat H+ and formylated aminotriol
574.519	C37 H68 O3 N	BHP Mex2 AnhydroBHT NH4+ and BHP 2xMe aminotriol H+
575.431	C35 H59 O6	BHP hexol unsatx2 H+
575.467	C36 H63 O5	BHP Me 31-oxo-BHT H+ and BHP Me pentol unsat H+
575.503	C37 H67 O4	BHP 2xMe BHT H+
575.515	C36 H67 N2 O3	diaminotriol
576.462	C35 H62 O5 N	BHP pentol unsatx2 NH4+ and BHP Aminopentol Unsat H+
576.499	C36 H66 O4 N	BHP BHT Me unsat NH4+ and BHP Me Anhydro-Pentol NH4+ and BHP Me aminotetrol H+
577.446	C35 H61 O6	BHP Hexol Unsat H+
577.483	C36 H65 O5	BHP Me pentol H+
578.478	C35 H64 O5 N	BHP aminopentol H+ and BHP 31-oxo-BHT NH4+ and BHP Pentol Unsat NH4+
578.514	C36 H68 O4 N	BHP Me BHT NH4+
579.462	C35 H63 O6	BHP hexol H+
580.494	C35 H66 O5 N	BHP pentol NH4+
582.452	C37 H60 O4 N	diunsat. Me-oxazinone-aminotriol
584.431	C36 H58 O5 N	diunsat. oxazinone-aminotetrol
584.467	C37 H62 O4 N	diunsat. Me-formylated aminotriol and unsat. Me-oxazinone-aminotriol
585.499	C37 H65 N2 O3	diunsat. Me-diaminotriol
586.447	C36 H60 O5 N	diunsat. formylated aminotetrol and unsat. oxazinone-aminotetrol
586.483	C37 H64 O4 N	ethenolamine bht unsat and unsat. Me-formylated aminotriol and Me-oxazinone-aminotriol and dioxanone-methylaminotriol
587.478	C36 H63 N2 O4	diunsat. diaminotetrol
587.515	C37 H67 N2 O3	unsat. Me-diaminotriol
588.462	C36 H66 O5 N	BHP Me aminopentol unsatx2 H+ and BHP Me 31-oxo-BHT NH4+ and unsat. formylated aminotetrol and oxazinone-aminotetrol
588.499	C37 H66 O4 N	ethenolamine bht and Me-formylated aminotriol
589.446	C36 H61 O6	BHP Me hexol unsatx2 H+
589.494	C36 H65 N2 O4	unsat. diaminotetrol
589.53	C37 H69 N2 O3	Me-diaminotriol
590.442	C35 H60 O6 N	diunsat. BHT based and diunsat. aminohexol H+
590.478	C36 H64 O5 N	BHP 31-oxo-BHT unsat NH4+ and BHP Me pentol unsatx2 NH4+ and BHP Me aminopentol unsat H+ and formylated aminotetrol
590.514	C37 H68 O4 N	BHP 2xMe aminotetrol H+
591.462	C36 H63 O6	BHP Me Hexol Unsat H+
591.498	C37 H67 O5	BHP 2xMe pentol H+
591.51	C36 H67 N2 O4	diaminotetrol
592.457	C35 H62 O6 N	BHP hexol unsatx2 NH4+ and unsat. BHT based and unsat. aminohexol H+
592.494	C36 H66 O5 N	BHP Me Aminopentol H+ and BHP Me 31-oxo-BHT NH4+ and BHP Me pentol unsat NH4+
592.53	C37 H70 O4 N	BHP 2xMe BHT NH4+
593.478	C36 H65 O6	BHP Me hexol H+
594.473	C35 H64 O6 N	BHP Hexol Unsat NH4+ and BHT based and aminohexol H+
594.509	C36 H68 O5 N	BHP Me pentol NH4+
596.467	C38 H62 O4 N	diunsat. diMe-oxazinone-aminotriol H+
596.488	C35 H66 O6 N	BHP hexol NH4+
598.447	C37 H60 O5 N	diunsat. Me-oxazinone-aminotetrol
598.483	C38 H64 O4 N	diunsat. diMe-formylated aminotriol H+ and unsat. diMe-oxazinone-aminotriol H+
599.515	C38 H67 O3 N2	diunsat. aminotriol based and diunsat. diMe-diaminotriol based H+
600.426	C36 H58 O6 N	diunsat. oxazinone-aminopentol
600.462	C37 H62 O5 N	BHP MC aminotriol unsatx2 H+ and diunsat. Me-formylated aminotetrol and unsat. Me-oxazinone-aminotetrol
600.499	C38 H66 O4 N	ethenolamine bht +1me unsat and unsat. diMe-formylated aminotriol H+ and diMe-oxazinone-aminotriol H+
601.494	C37 H65 N2 O4	diunsat. Me-diaminotetrol
601.53	C38 H69 O3 N2	unsat. aminotriol based and unsat. diMe-diaminotriol based H+
602.442	C36 H60 O6 N	diunsat. formylated aminopentol and unsat. aminopentol based
602.478	C37 H64 O5 N	BHP MC aminotriol unsat H+ and Me-oxazinone-aminotetrol and unsat. Me-formylated aminotetrol
602.514	C38 H68 O4 N	ethenolamine bht +1me and diMe-formylated aminotriol H+
603.498		BHP Frankia 1 H+
603.51	C37 H67 N2 O4	unsat. Me-diaminotetrol
603.546	C38 H71 O3 N2	aminotriol based and diMe-diaminotriol based H+
604.457	C36 H62 O6 N	unsat. formylated aminopentol and diunsat. Me-BHT based and oxazinone-aminopentol and diunsat. Me-aminohexol H+
604.494	C37 H66 O5 N	BHP MC aminotriol H+ and ethenolamine BHT H+ and Me-formylated aminotetrol
605.525	C37 H69 N2 O4	Me-diaminotetrol
606.436	C35 H60 O7 N	diunsat. pentol based
606.473	C36 H64 O6 N	BHP Me hexol unsatx2 NH4+ and formylated aminopentol and unsat. Me-BHT based and unsat. Me-aminohexol H+
606.509	C37 H68 O5 N	BHP 2xMe aminopentol H+
608.452	C35 H62 O7 N	unsat. pentol based
608.488	C36 H66 O6 N	BHP Me Hexol Unsat NH4+ and Me-BHT based and Me-aminohexol H+
608.525	C37 H70 O5 N	BHP 2xMe pentol NH4+
610.468	C35 H64 O7 N	pentol based
610.504	C36 H68 O6 N	BHP Me hexol NH4+
612.462	C38 H62 O5 N	diunsat. diMe-oxazinone-aminotetrol H+
613.53	C39 H69 O3 N2	diunsat. Me-aminotriol based
614.442	C37 H60 O6 N	diunsat. Me-oxazinone-aminopentol
614.478	C38 H64 O5 N	BHP Me MC aminotriol unsatx2 H+ and unsat. diMe-oxazinone-aminotetrol H+ and diunsat. diMe-formylated aminotetrol H+
614.514	C39 H68 O4 N	ethenolamine bht +2me unsat
615.51	C38 H67 N2 O4	diunsat. diMe-diaminotetrol based H+ and diunsat. aminotetrol based
615.546	C39 H71 O3 N2	unsat. Me-aminotriol based
616.457	C37 H62 O6 N	BHP MC aminotetrol unsatx2 H+ and unsat. Me-oxazinone-aminopentol and diunsat. Me-formylated aminopentol
616.494	C38 H66 O5 N	BHP Me MC aminotriol unsat H+ and diMe-oxazinone-aminotetrol H+ and unsat. diMe-formylated aminotetrol H+
616.53	C39 H70 O4 N	ethenolamine bht +2me
617.525	C38 H69 N2 O4	unsat. diMe-diaminotetrol based H+ and unsat. aminotetrol based
617.562	C39 H73 O3 N2	Me-aminotriol based
618.436	C36 H60 N O7	diunsat. BHT based nitrite
618.473	C37 H64 O6 N	BHP MC aminotetrol unsat H+ and unsat. Me-formylated aminopentol and Me-oxazinone-aminopentol and diunsat. diMe-BHT based H+ and diunsat. diMe-aminohexol H+
618.509	C38 H68 O5 N	BHP Me MC aminotriol H+ and Me ethenolamine BHT H+ and diMe-formylated aminotetrol H+
619.541	C38 H71 O4 N2	aminotetrol based and diMe-diaminotetrol based H+
620.452	C36 H62 N O7	unsat. BHT based nitrite and diunsat. Me-pentol based
620.488	C37 H66 O6 N	BHP MC aminotetrol H+ and ethenolamine hexol H+ and Me-formylated aminopentol and unsat. diMe-aminohexol H+ and unsat. diMe-BHT based H+
620.525		BHP Frankia 1 NH4+
622.431	C35 H60 O8 N	diunsat. hexol based
622.468	C36 H64 N O7	BHT based nitrite and unsat. Me-pentol based
622.504	C37 H68 O6 N	diMe-BHT based H+ and diMe-aminohexol H+
624.447	C35 H62 O8 N	unsat. hexol based
624.483	C36 H66 O7 N	Me-pentol based
626.463	C35 H64 O8 N	hexol based
627.546	C40 H71 O3 N2	diunsat. diMe-aminotriol based H+
628.457	C38 H62 O6 N	diunsat. diMe-oxazinone-aminopentol H+
628.517	C39 H68 O4 N2	diunsat. Me-aminotetrol based
628.53	C40 H70 O4 N	propylamine bht +2me unsat
629.562	C40 H73 O3 N2	unsat. diMe-aminotriol based H+
630.473	C38 H64 O6 N	BHP Me MC aminotetrol unsatx2 H+ and unsat. diMe-oxazinone-aminopentol H+ and diunsat. diMe-formylated aminopentol H+
630.509	C39 H68 O5 N	ethenolamine pentol +2me unsat
630.533	C39 H70 O4 N2	unsat. Me-aminotetrol based
630.546	C40 H72 O4 N	propylamine bht +2me
631.504	C38 H67 O5 N2	diunsat. aminopentol based
631.577	C40 H75 O3 N2	diMe-aminotriol H+ based H+
632.452	C37 H62 N O7	BHP MC aminopentol unsatx2 H+ and diunsat. Me-BHT based nitrite
632.488	C38 H66 O6 N	BHP Me MC aminotetrol unsat H+ and diMe-oxazinone-aminopentol H+ and unsat. diMe-formylated aminopentol H+
632.525	C39 H70 O5 N	ethenolamine pentol +2me
632.549	C39 H72 O4 N2	Me-aminotetrol based
632.561	C40H74O4N	C6:0 acyl-aminotriol
633.52	C38 H69 O5 N2	unsat. aminopentol based
634.431	C36 H60 N O8	diunsat. pentol based nitrite
634.468	C37 H64 N O7	BHP MC aminopentol unsat H+ and unsat. Me-BHT based nitrite and diunsat. diMe-BHpentol based H+
634.504	C38 H68 O6 N	BHP Me MC aminotetrol H+ and Me ethenolamine hexol H+ and diMe-formylated aminopentol H+
635.536	C38 H71 O5 N2	aminopentol based
636.447	C36 H62 O8 N	diunsat. Me-hexol based and unsat. pentol based nitrite
636.483	C37 H66 N O7	BHP MC aminopentol H+ and Me-BHT based nitrite and unsat. diMe-BHpentol based H+
638.463	C36 H64 O8 N	unsat. Me-hexol based and pentol based nitrite
638.499	C37 H68 O7 N	diMe-BHpentol based H+
640.478	C36 H66 O8 N	Me-hexol based
642.533	C40 H70 O4 N2	diunsat. diMe-aminotetrol based H+
644.549	C40 H72 O4 N2	unsat. diMe-aminotetrol based H+
645.52	C39 H69 O5 N2	diunsat. Me-aminopentol based
646.468	C38 H64 N O7	BHP Me MC aminopentol unsatx2 H+ and diunsat. diMe-BHT based H+
646.504	C39 H68 O6 N	ethenolamine hexol +2me unsat
646.564	C40 H74 O4 N2	diMe-aminotetrol based H+
647.536	C39 H71 O5 N2	unsat. Me-aminopentol based
648.447	C37 H62 N O8	diunsat. Me-pentol based nitrite
648.483	C38 H66 N O7	BHP Me MC aminopentol unsat H+ and unsat. diMe-BHT based H+
648.52	C39 H70 O6 N	ethenolamine hexol +2me
648.556	C40H74O5N	C6:0 acyl-aminotetrol
649.551	C39 H73 O5 N2	Me-aminopentol based
650.426	C36 H60 N O9	diunsat. hexol based nitrite
650.463	C37 H64 N O8	unsat. Me-pentol based nitrite and diunsat. diMe-BHhexol based H+
650.499	C38 H68 N O7	BHP Me MC aminopentol H+ and diMe-BHT based H+
652.442	C36 H62 N O9	unsat. hexol based nitrite
652.478	C37 H66 N O8	Me-pentol based nitrite and unsat. diMe-BHhexol based H+
654.458	C36 H64 N O9	hexol based nitrite
654.494	C37 H68 O8 N	diMe-BHhexol based H+
658.469	C40 H60 O3 N5	BHP Adenosylhopane unsatx2 H+
658.577	C42H76O4N	C7:0 acyl-aminotriol
659.536	C40 H71 O5 N2	diunsat. diMe-aminopentol based H+
660.485	C40 H62 O3 N5	BHP Adenosylhopane unsat H+
661.551	C40 H73 O5 N2	unsat. diMe-aminopentol based H+
662.463	C38 H64 N O8	diunsat. diMe-BHpentol based H+
662.5	C40 H64 O3 N5	BHP Adenysolhopane H+
663.484	C40 H63 O4 N4	inosylhopane
663.567	C40 H75 O5 N2	diMe-aminopentol based H+
664.442	C37 H62 N O9	diunsat. Me-hexol based nitrite
664.478	C38 H66 N O8	unsat. diMe-BHpentol based H+
664.551	C40H74O6N	C6:0 acyl-aminopentol
665.514		BHP Frankia 2 H+
666.458	C37 H64 N O9	unsat. Me-hexol based nitrite
666.494	C38 H68 N O8	diMe-BHpentol based H+
668.473	C37 H66 N O9	Me-hexol based nitrite
670.577	C43H76O4N	C8:1 acyl-aminotriol
672.485	C41 H62 O3 N5	BHP Me Adenosylhopane unsatx2 H+
672.593	C43 H78 O4 N	C8:0 acyl-aminotriol
674.5	C41 H64 O3 N5	BHP Me Adenosylhopane unsat H+
674.572	C42H76O5N	C7:0 acyl-aminotetrol
676
676.516	C41 H66 O3 N5	BHP Me Adenylsolhopane H+ and C16:1-aminopentol
677.5	C41 H65 O4 N4	N-methyl-inosyl-hopane
678.458	C38 H64 N O9	diunsat. diMe-BHhexol based H+
680.473	C38 H66 N O9	unsat. diMe-BHhexol based H+
682.489	C38 H68 N O9	diMe-BHhexol based H+
682.54		BHP Frankia 2 NH4+
682.577	C44H76O4N	C9:2 acyl-aminotriol
684.593	C44H78O4N	C9:1 acyl-aminotriol
686.608	C44H80O4N	C9:0 acyl-aminotriol
687.522	C45H69O4N	C10:2 acyl-aminotriol
688.587	C43H78O5N	C8:0 acyl-aminotetrol
690.015
690.532	C42 H68 O3 N5	adenosyl hopane + 2 Me
690.567	C42H76O6N	C7:0 acyl-aminopentol
691.515
691.516	C42 H67 O4 N4	me-N-methyl-inosyl-hopane
698.572	C44H76O5N	C9:2 acyl-aminotetrol
698.608	C45H80O4N	C10:1 acyl-aminotriol
700.587	C44H78O5N	C9:1 acyl-aminotetrol
700.624	C45H82O4N	C10:0 acyl-aminotriol
702.494	C41 H68 O8 N	BHP 32-oxo-bacteriohopanetriol glucosamine unsat x2 H+
702.603	C44H80O5N	C9:0 acyl-aminotetrol
704.03
704.51	C41 H70 O8 N	BHP 32-oxo-bacteriohopanetriol glucosamine unsat H+ and BHP BHT CE unsatx2 H+ and BHP BHT glucosamine unsatx2 H+
704.547	C43 H70 O3 N5	adenosyl hopane + 3 Me
704.582	C43H78O6N	C8:0 acyl-aminopentol
705.494	C41 H69 O9	BHP BHT-pseudopentose unsatx2 H+
705.53
705.531	C43 H69 O4 N4	adenosyl hopane + 3 Me
706.525	C41 H72 O8 N	BHP 32-oxo-bacteriohopanetriol glucosamine H+ and BHP BHT CE unsat H+ and BHP BHT glucosamine unsat H+
707.509	C41 H71 O9	BHP BHT Pseudopentose Unsat H+
708.541	C41 H74 O8 N	BHP BHT-CE H+ and BHP BHT glucosamine H+
709.525	C41 H73 O9	BHP BHT Pseudopentose H+
710.608	C46H80O4N	C11:2 acyl-aminotriol
712.587	C45H78O5N	C10:2 acyl-aminotriol
712.624	C46H82O4N	C11:1 acyl-aminotriol
714.567	C44H76O6N	C9:2 acyl-aminopentol
714.603	C45H80O5N	C10:1 acyl-aminotriol
714.639	C46H84O4N	C11:0 acyl-aminotriol
716.51	C42 H70 O8 N	BHP Me 32-oxo-bacteriohopanetriol glucosamine unsat x2 H+
716.582	C44H78O6N	C9:1 acyl-aminopentol
716.619	C45H82O5N	C10:0 acyl-aminotriol
718.045
718.525	C42 H72 O8 N	BHP Me 32-oxo-bacteriohopanetriol glucosamine unsat H+ and BHP Me BHT CE unsatx2 H+ and BHP Me BHT glucosamine unsatx2 H+
718.563	C44 H72 O3 N5	adenosyl hopane + x4 Me
718.598	C44H80O6N	C9:0 acyl-aminopentol
719.509	C42 H71 O9	BHP Me BHT-pseudopentose unsatx2 H+
720.505	C41 H70 O9 N	BHP pentol CE unsatx2 H+ and BHP pentol glucosamine unsatx2 H+
720.541	C42 H74 O8 N	BHP Me BHT CE unsat H+ and BHP Me BHT glucosamine unsat H+ and BHP Me 32-oxo-bacteriohopanetriol glucosamine H+
721.489	C41 H69 O10	BHP pentol pseudopentose unsatx2 H+
721.525	C42 H73 O9	BHP Me BHT pesudopentose unsat H+
721.665		DGTS-d9 STD H+
722.52	C41 H72 O9 N	BHP BHT-pseudopentose unsatx2 NH4+ and BHP pentol CE unsat H+ and BHP pentol glucosamine unsat H+
722.557	C42 H76 O8 N	BHP Me BHT glucosamine H+ and BHP Me BHT-CE H+
723.504	C41 H71 O10	BHP pentol pseudopentose unsat H+
723.541	C42 H75 O9	BHP Me BHT Pseudopentose H+
724.536	C41 H74 O9 N	BHP BHT Psudopentose Unsat NH4+ and BHP BH-Pentol CE H+ and BHP pentol glucosamine H+
724.624	C47H82O4N	C12:2 acyl-aminotriol
725.52	C41 H73 O10	BHP pentol pseudopentose H+
726.551	C41 H76 O9 N	BHP BHT Pseudopentose NH4+
726.603	C46H80O5N	C11:2 acyl-aminotriol
728.582	C45H78O6N	C10:2 acyl-aminopentol
728.619	C46H82O5N	C11:1 acyl-aminotriol
728.655	C47H86O4N	C12:0 acyl-aminotriol
730.598	C45H80O6N	C10:1 acyl-aminopentol
730.634	C46H84O5N	C11:0 acyl-aminotriol
732.614	C45H82O6N	C10:0 acyl-aminopentol
734.52	C42 H72 O9 N	BHP Me pentol CE unsatx2 H+ and BHP Me pentol glucosamine unsatx2 H+
735.504	C42 H71 O10	BHP Me pentol pseudopentose unsatx2 H+
736.499	C41 H70 O10 N	BHP hexol CE unsatx2 H+ and BHP hexol glucosamine unsatx2 H+
736.536	C42 H74 O9 N	BHP Me BHT-pseudopentose unsatx2 NH4+ and BHP Me pentol CE unsat H+ and BHP Me pentol glucosamine unsat H+
737.483	C41 H69 O11	BHP hexol pseudopentose unsatx2 H+
737.52	C42 H73 O10	BHP Me pentol pseudopentose unsat H+
738.515	C41 H72 O10 N	BHP pentol pseudopentose unsatx2 NH4+ and BHP hexol CE unsat H+ and BHP hexol glucosamine unsat H+
738.551	C42 H76 O9 N	BHP Me BHT pesudopentose NH4+ and BHP Me BH-Pentol CE H+ and BHP Me pentol glucosamine H+
738.639	C48H84O4N	C13:2 acyl-aminotriol
739.499	C41 H71 O11	BHP hexol pseudopentose unsat H+
739.535	C42 H75 O10	BHP Me pentol pseudopentose H+
740.531	C41 H74 O10 N	BHP pentol pseudopentose unsat NH4+ and BHP Hexol CE H+ and BHP hexol glucosamine H+
740.567	C42 H78 O9 N	BHP Me BHT Pseudopentose NH4+
740.619	C47H82O5N	C12:2 acyl-aminotetrol
740.655	C48H86O4N	C13:1 acyl-aminotriol
741.515	C41 H73 O11	BHP hexol pseudopentose H+
742.546	C41 H76 O10 N	BHP pentol pseudopentose NH4+
742.598	C46H80O6N	C11:2 acyl-aminopentol
742.634	C47H84O5N	C12:1 acyl-aminotriol and C12:1 acyl-aminotetrol
742.671	C48H88O4N	C13:0 acyl-aminotriol
744.614	C46H82O6N	C11:1 acyl-aminopentol
744.65	C47H86O5N	C12:0 acyl-aminotetrol
746.629	C46H84O6N	C11:0 acyl-aminopentol
750.515	C42 H72 O10 N	BHP Me hexol CE unsatx2 H+ and BHP Me hexol glucosamine unsatx2 H+
751.499	C42 H71 O11	BHP Me hexol pseudopentose unsatx2 H+
752.531	C42 H74 O10 N	BHP Me pentol pseudopentose unsatx2 NH4+ and BHP Me hexol CE unsat H+ and BHP Me hexol glucosamine unsat H+
752.655	C49H86O4N	C14:2 acyl-aminotriol
753.515	C42 H73 O11	BHP Me hexol pseudopentose unsat H+
754.51	C41 H72 O11 N	BHP hexol pseudopentose unsatx2 NH4+
754.546	C42 H76 O10 N	BHP Me pentol pseudopentose unsat NH4+ and BHP Me Hexol CE H+ and BHP Me hexol glucosamine H+
754.634	C48H84O5N	C13:2 acyl-aminotetrol
754.671	C49H88O4N	C14:1 acyl-aminotriol
755.53	C42 H75 O11	BHP Me hexol pseudopentose H+
756.526	C41 H74 O11 N	BHP hexol pseudopentose unsat NH4+
756.562	C42 H78 O10 N	BHP Me pentol pseudopentose NH4+
756.614	C47H82O6N	C12:2 acyl-aminopentol
756.65	C48H86O5N	C13:1 acyl-aminotetrol
756.686	C49 H90 O4 N	C14:0 acyl-aminotriol
758.541	C41 H76 O11 N	BHP hexol pseudopentose NH4+
758.629	C47H84O6N	C12:1 acyl-aminopentol
758.666	C48H88O5N	C13:0 acyl-aminotetrol
760.645	C47H86O6N	C12:0 acyl-aminopentol
766.671	C50H88O4N	C15:2 acyl-aminotriol
768.526	C42 H74 O11 N	BHP Me hexol pseudopentose unsatx2 NH4+
768.65	C49H86O5N	C14:2 acyl-aminotetrol
768.686	C50H90O4N	C15:1 acyl-aminotriol
770.541	C42 H76 O11 N	BHP Me hexol pseudopentose unsat NH4+
770.629	C48H84O6N	C13:2 acyl-aminopentol
770.666	C49H88O5N	C14:1 acyl-aminotetrol
770.702	C50 H92 O4 N	C15:0 acyl-aminotriol
772.557	C42 H78 O11 N	BHP Me hexol pseudopentose NH4+
772.645	C48H86O6N	C13:1 acyl-aminopentol
772.681	C49H90O5N	C14:0 acyl-aminotetrol
774.661	C48H88O6N	C13:0 acyl-aminopentol
780.686	C51 H90 O4 N	C16:2 acyl-aminotriol
782.666	C50H88O5N	C15:2 acyl-aminotetrol
782.702	C51 H92 O4 N	C16:1 acyl-aminotriol
784.645	C49H86O6N	C14:2 acyl-aminopentol
784.681	C50H90O5N	C15:1 acyl-aminotetrol
784.718	C51 H94 O4 N	C16:0 acyl-aminotriol
786.661	C49H88O6N	C14:1 acyl-aminopentol
786.697	C50H92O5N	C15:0 acyl-aminotetrol
788.676	C49 H90 O6 N	C14:0 acyl-aminopentol
794.702	C52H92O4N	C17:2 acyl-aminotriol
796.681	C51H90O5N	C16:2 acyl-aminotetrol
796.718	C52H94O4N	C17:1 acyl-aminotriol
798.661	C50H88O6N	C15:2 acyl-aminopentol
798.697	C51H92O5N	C16:1 acyl-aminotetrol
798.733	C52 H96 O4 N	C17:0 acyl-aminotriol
800.676	C50H90O6N	C15:1 acyl-aminopentol
800.713	C51H94O5N	C16:0 acyl-aminotetrol
802.692	C50 H92 O6 N	C15:0 acyl-aminopentol
808.718	C53H94O4N	C18:2 acyl-aminotriol
810.697	C52H92O5N	C17:2 acyl-aminotetrol
810.733	C53H96O4N	C18:1 acyl-aminotriol
812.676	C51H90O6N	C16:2 acyl-aminopentol
812.713	C52H94O5N	C17:1 acyl-aminotetrol and ethenolamine tetrol-C15:0
812.749	C53H98O4N	C18:0 acyl-aminotriol
814.692	C51H92O6N	C16:1 acyl-aminopentol
814.728	C52H96O5N	C17:0 acyl-aminotetrol
816.708	C51 H94 O6 N	C16:0 acyl-aminopentol
822.733	C54H96O4N	C19:2 acyl-aminotriol
824.713	C53H94O5N	C18:2 acyl-aminotetrol and ethenolamine tetrol-C16:1
824.749	C54H98O4N	C19:1 acyl-aminotriol
826.692	C52H92O6N	C17:2 acyl-aminopentol and ethenolamine pentol-C15:1
826.728	C53H96O5N	C18:1 acyl-aminotetrol and ethenolamine tetrol-C16:0
826.765	C54H100O4N	C19:0 acyl-aminotriol
828.671	C51 H90 O7 N	ethenolamine hexol -C14:1
828.708	C52H94O6N	C17:1 acyl-aminopentol and ethenolamine pentol-C15:0
828.744	C53H98O5N	C18:0 acyl-aminotetrol
830.687	C51 H92 O7 N	ethenolamine hexol -C14:0
830.723	C52H96O6N	C17:0 acyl-aminopentol
838.728	C54H96O5N	C19:2 acyl-aminotetrol and ethenolamine tetrol -C17:1
840.708	C53H94O6N	C18:2 acyl aminopentol and ethenolamine pentol-C16:1
840.744	C54 H98 O5 N	C19:1 acyl-aminotetrol and ethenolamine tetrol -C17:0
842.687	C52 H92 O7 N	ethenolamine hexol-C15:1
842.723	C53H96O6N	C18:1 acyl-aminopentol and ethenolamine pentol-C16:0
842.76	C54H100O5N	C19:0 acyl-aminotetrol
844.702	C52 H94 O7 N	ethenolamine hexol-C15:0
844.739	C53H98O6N	C18:0 acyl-aminopentol
852.744	C55 H98 O5 N	ethenolamine tetrol -C18:1
854.723	C54H96O6N	C19:2 acyl-aminopentol and ethenolamine pentol-C17:1
854.76	C55 H100 O5 N	ethenolamine tetrol -C18:0
856.702	C53 H94 O7 N	ethenolamine hexol-C16:1
856.739	C54H98O6N	C19:1 acyl-aminopentol and ethenolamine pentol-C17:0
858.718	C53 H96 O7 N	ethenolamine hexol-C16:0
858.755	C54H100O6N	C19:0 acyl-aminopentol
866.76	C56 H100 O5 N	ethenolamine terol-C19:1
868.03	C57 H10 O10 N	C16:1-glucuronyl-aminotriol
868.739	C55 H98 O6 N	ethenolamine pentol-C18:1
868.775	C56 H102 O5 N	ethenolamine terol-C19:0
870.718	C54 H96 O7 N	ethenolamine hexol-C17:1
870.755	C55 H100 O6 N	ethenolamine pentol-C18:0
872.734	C54 H98 O7 N	ethenolamine hexol-C17:0
882.755	C56 H100 O6 N	ethenolamine pentol-C19:1
884.025	C57 H10 O11 N	C16:1-glucuronyl-aminotetrol
884.734	C55 H98 O7 N	ethenolamine hexol-C18:1
884.77	C56 H102 O6 N	ethenolamine pentol-C19:0
886.749	C55 H100 O7 N	ethenolamine hexol-C18:0
898.749	C56 H100 O7 N	ethenolamine hexol-C19:1
900.02	C57 H10 O12 N	C16:1 -glucuronyl-aminopentol
900.765	C56 H102 O7 N	ethenolamine hexol-C19:0
928.687	C55 H94 O10 N	C14:2-glucuronyl-aminotriol
930.703	C55 H96 O10 N	C14:1-glucuronyl-aminotriol
932.719	C55 H98 O10 N	C14:0-glucuronyl-aminotriol
942.703	C56 H96 O10 N	C15:2-glucuronyl-aminotriol
944.682	C55 H94 O11 N	C14:2-glucuronyl-aminotetrol
944.719	C56 H98 O10 N	C15:1-glucuronyl-aminotriol
946.698	C55 H96 O11 N	C14:1-glucuronyl-aminoetrol
946.734	C56 H100 O10 N	C15:0-glucuronyl-aminotriol
948.713	C55 H98 O11 N	C14:0-glucuronyl-aminotetrol
956.719	C57 H98 O10 N	C16:2-glucuronyl-aminotriol
958.698	C56 H96 O11 N	C15:2-glucuronyl-aminoterol
960.677	C55 H94 O12 N	C14:2 -glucuronyl-aminopentol
960.713	C56 H98 O11 N	C15:1-glucuronyl-aminotetrol
960.75	C57 H102 O10 N	C16:0-glucuronyl-aminotriol
962.693	C55 H96 O12 N	C14:1 -glucuronyl-aminopentol
962.729	C56 H100 O11 N	C15:0-glucuronyl-aminotetrol
964.708	C55 H98 O12 N	C14:0 -glucuronyl-aminopentol
970.734	C58 H100 O10 N	C17:2-glucuronyl-aminotriol
972.713	C57 H98 O11 N	C16:2-glucuronyl-aminotetrol
972.75	C58 H102 O10 N	C17:1-glucuronyl-aminotriol
974.693	C56 H96 O12 N	C15:2 -glucuronyl-aminopentol
974.765	C58 H104 O10 N	C17:0-glucuronyl-aminotriol
976.708	C56 H98 O12 N	C15:1 -glucuronyl-aminopentol
976.745	C57 H102 O11 N	C16:0-glucuronyl-aminotetrol
978.724	C56 H100 O12 N	C15:0 -glucuronyl-aminopentol
984.75	C59 H102 O10 N	C18:2-glucuronyl-aminotriol
986.729	C58 H100 O11 N	C17:2-glucuronyl-aminotetrol
986.765	C59 H104 O10 N	C18:1-glucuronyl-aminotriol
988.708	C57 H98 O12 N	C16:2 -glucuronyl-aminopentol
988.745	C58 H102 O11 N	C17:1-glucuronyl-aminotetrol
988.781	C59 H106 O10 N	C18:0 -glucuronyl-aminotriol
990.76	C58 H104 O11 N	C17:0 -glucuronyl-aminotetrol
992.74	C57 H102 O12 N	C16:0 -glucuronyl-aminopentol
1000.74	C59 H102 O11 N	C18:2-glucuronyl-aminotetrol
1002.72	C58 H100 O12 N	C17:2 -glucuronyl-aminopentol
1002.76	C59 H104 O11 N	C18:1-glucuronyl-aminotetrol
1004.74	C58 H102 O12 N	C17:1 -glucuronyl-aminopentol
1004.78	C59 H106 O11 N	C18:0-glucuronyl-aminotetrol
1006.76	C58 H104 O12 N	C17:0 -glucuronyl-aminopentol
1016.74	C59 H102 O12 N	C18:2 -glucuronyl-aminopentol
1018.76	C59 H104 O12 N	C18:1 -glucuronyl-aminopentol
1020.77	C59 H106 O12 N	C18:0 -glucuronyl-aminopentol
