# Supplementary material for: Distributions of bacteriohopanepolyols in lakes and coastal lagoons of the Azores Archipelago
Source: Copernicus journal article supplement (doi:10.5194/bg-20-2065-2023), 2023-06-12
Supplement: Supplementary file 5 [file TableS5-S7_LakeProperties.xlsx]

## Sheet: TableS5
Table S5. Water column profile for Lake Azul measured in June 2018.
Depth (m)	Temperature (°C)	pH	ORP (mV)	Conductivity (mS/cm)	Turbidity (NTU)	DO (mg/L)	DO (%)	Total Dissolved Soilds (g/L)	Salinity (ppt)
21.6	14.4	8.22	93	0.106	56.9	4.88	49.3	0.069	0
20.9	14.07	8.01	84	0.108	53.4	5.4	54.4	0.07	0
20.05	14.01	7.94	10	0.107	67.8	5.59	56	0.07	0
19.1	14.01	7.9	105	0.106	8.8	5.3	57	0.069	0
18	14.04	7.84	111	0.108	5.8	5.8	58.3	0.07	0.1
17	14.08	7.9	116	0.109	6.6	5.64	56.6	0.071	0.1
16	14.12	7.78	119	0.109	12.2	5.77	57.7	0.071	0.1
15.05	14.17	7.8	112	0.108	8.7	6.8	63.3	0.7	0.1
14	14.23	7.81	125	0.107	5.6	6.3	63.5	0.069	0
13.1	14.32	7.8	131	0.106	7.8	6.53	65.7	0.069	0
11.85	14.35	7.79	133	0.108	4.2	6.4	64.7	0.07	0
11.05	14.45	7.75	136	0.109	3.7	6.38	64.6	0.071	0.1
10.05	14.56	7.8	136	0.108	5.1	6.39	64.9	0.07	0
9.05	14.68	7.79	137	0.107	3.5	6.29	64	0.07	0
7.95	14.87	7.75	140	0.111	6	6.31	64.4	0.072	0.1
7.05	15.56	7.78	140	0.108	12.4	6.33	65.7	0.07	0
6	18.01	7.88	135	0.111	11.8	6.58	71.7	0.073	0.1
5.05	19.85	8.42	110	0.11	14.1	7.45	84.1	0.072	0.1
4	20.4	9.28	104	0.116	11.4	11.4	88.9	0.073	0.1
3.1	20.49	9.69	97	0.113	12.5	8.09	92.3	0.074	0.1
2	20.57	9.88	93	0.112	11.2	8.35	95.5	0.073	0.1
1	20.6	9.93	90	0.114	11.9	8.56	97.9	0.074	0.1
0	20.62	10		0.112	16.9	8.52	93.4	0.073	0.1

## Sheet: TableS6
Table S6. Water column profile for Lake Funda measured in June 2018.
Depth (m)	Temperature (°C)	pH	ORP (mV)	Conductivity (mS/cm)	Turbidity (NTU)	DO (mg/L)	DO (%)	Total Dissolved Soilds (g/L)	Salinity (ppt)
29	12.28	8.28	-109	0.145	4	2.5	24.1	0.094	0.1
27.95	12.38	7.91	-129	0.144	0.4	2.24	21.7	0.094	0.1
27	12.21	7.8	-136	0.144	0.4	2.19	21.1	0.094	0.1
26	12.2	7.79	-140	0.143	0	2.17	20.1	0.093	0.1
25	12.14	7.86	-142	0.141	0	2.21	21.2	0.092	0.1
24	12.11	7.83	-136	0.14	0.1	2.19	21.1	0.091	0.1
23	12.12	7.96	-140	0.14	0.3	2.13	20.5	0.091	0.1
22	12.16	7.98	-136	0.139	0.6	2.1	20.2	0.09	0.1
21	12.21	8	-133	0.138	0.5	2.04	19.6	0.09	0.1
20	12.2	8.02	-127	0.137	0.8	2.05	19.7	0.089	0.1
19	12.18	8.03	-118	0.136	0	2.09	20.1	0.088	0.1
18	12.18	8.03	-92	0.134	0	2.89	27.8	0.087	0.1
17	12.19	8.09	-65	0.134	0	4.71	45.6	0.087	0.1
16	12.21	8.16	-24	0.134	0	4.87	56.6	0.087	0.1
15	12.26	8.14	8	0.134	1.5	6.22	60	0.087	0.1
14	12.3	8.27	19	0.134	0.3	5.7	55	0.087	0.1
13	12.33	8.17	34	0.134	0.2	6.38	61.6	0.087	0.1
12	12.41	8.34	38	0.134	0.1	6.68	64.7	0.087	0.1
11	12.51	8.27	48	0.136	0.3	6.32	61.3	0.088	0.1
10	12.65	8.11	62	0.137	0.7	6.47	63	0.089	0.1
9	12.82	7.97	77	0.136	1.2	6.62	64.7	0.088	0.1
8	13.02	8.23	64	0.136	2.5	6.6	64.8	0.088	0.1
7	13.86	7.83	92	0.139	3	6.13	61.3	0.09	0.1
6	15.15	8.19	74	0.136	5.4	5.58	57.3	0.088	0.1
5	16.15	8.79	52	0.135	8.7	5.47	57.4	0.088	0.1
4	17.12	9.44	44	0.136	11.7	6.33	67.7	0.088	0.1
3	18.21	10.7	-6	0.138	16.3	7.29	79.7	0.09	0.1
2	19.56	11.14	-19	0.143	32.8	8.62	96.7	0.093	0.1
1	19.7	11.25	-20	0.143	29.4	8.57	96.4	0.093	0.1
0	19.79	11.32	-20	0.143	28.3	9.07	102.2	0.093	0.1

## Sheet: TableS7
Table S7. The annual average water column properties are based on long-term monitoring data from 2003-2017 (University of the Azores monitoring program).
Site information		Annual Average Water Column properties
Island	Lake/Lagoon	NH4	NO3		NO2
		(µg /L)	(µg /L)		(µg /L)
São Miguel	Azul	86.83	0.46		16.34
São Miguel	Verde	263.94	0.45		24.26
Sao Miguel	Empadadas Norte	15.19	0.75		20.2
São Jorge	São Jorge	-	-		-
São Jorge	Fãja dos Cubres East	-	-		-
São Jorge	Fãja dos Cubres West	-	-		-
Flores	Funda	248.7	0.69		39.89
Flores	Lomba	19.57	0.38		22.2
Flores	Negra	86.4	0.8		24.83
*University of the Azores monitoring program (2003-2017); Cordeiro et al. (2020)
